# Supplementary material
Source: PubMed Central journal article supplement (PMC5085065)
Supplement: NIHMS817175-supplement-Supplement1.pdf [file NIHMS817175-supplement-Supplement1.pdf]

## Supplementary Appendix

This appendix has been provided by the authors to give readers additional information about their work.

Supplement to: Sheehan WJ, Mauger DT, Paul IM, et al. Acetaminophen versus ibuprofen in young children with mild persistent asthma. *N Engl J Med* 2016;375:619-30. DOI: 10.1056/NEJMoa1515990

## **Supplementary Appendix:**

### **Supplement to:**

Acetaminophen versus Ibuprofen in Children with Mild Persistent Asthma

Sheehan WJ, Mauger DT, Paul IM, et al.

### **Contents:**

|                                                                                         |         |
|-----------------------------------------------------------------------------------------|---------|
| NHLBI AsthmaNet Data Coordinating Center<br>and Clinical Center Principal Investigators | Page 2  |
| Additional Contributors to the Study                                                    | Page 4  |
| Criteria for Initiating Rescue Therapy                                                  | Page 6  |
| Supplemental Table S1                                                                   | Page 7  |
| Supplemental Table S2                                                                   | Page 8  |
| Supplemental Table S3                                                                   | Page 9  |
| Supplemental Table S4                                                                   | Page 10 |

| <b>Data Coordinating Center</b> | <b>Principal Investigator</b>                                                  |                                                                                        |
|---------------------------------|--------------------------------------------------------------------------------|----------------------------------------------------------------------------------------|
| <b>Penn State</b>               | David T Mauger, Ph.D.<br>The Penn State University                             |                                                                                        |
| <b>Clinical Centers</b>         | <b>Principal Investigator-Adult Asthma</b>                                     | <b>Principal Investigator-Childhood Asthma</b>                                         |
| <b>Boston</b>                   | Elliot Israel, M.D.<br>Brigham and Women's Hospital,<br>Harvard Medical School | Wanda Phipatanakul, M.D., M.S.<br>Boston Children's Hospital<br>Harvard Medical School |
| <b>Chicago</b>                  | Lewis Smith, M.D.<br>Northwestern University                                   | Jacqueline Pongracic, M.D.<br>Children's Memorial Hospital                             |
| <b>Denver</b>                   | Michael Wechsler, M.D.<br>National Jewish Health                               | Stanley Szeffler, M.D.<br>Breathing Institute<br>Children's Hospital Colorado          |
| <b>Madison</b>                  | Christine Sorkness, Pharm. D.<br>University of Wisconsin-Madison               | Robert Lemanske, M.D.<br>University of Wisconsin-Madison                               |
| <b>Pittsburgh</b>               | Sally Wenzel, M.D.<br>University of Pittsburgh                                 | Fernando Holguin, M.D.<br>University of Pittsburgh                                     |

|                                        |                                                                  |                                                                                |
|----------------------------------------|------------------------------------------------------------------|--------------------------------------------------------------------------------|
| <b>San Francisco</b>                   | Stephen Lazarus, M.D.<br>University of California- San Francisco | Michael Cabana, M.D.<br>University of California, San Francisco                |
| <b>St. Louis</b>                       | Mario Castro, M.D.<br>Washington University                      | Leonard Bacharier, M.D.<br>Washington University                               |
| <b>Tucson- Durham</b>                  | Monica Kraft, M.D.<br>University of Arizona                      | Fernando Martinez, M.D.<br>Arizona Respiratory Center<br>University of Arizona |
| <b>Winston- Salem- Charlottesville</b> | Stephen Peters. M.D.<br>Wake Forest University Health Sciences   | Anne Fitzpatrick, PhD<br>Emory University                                      |

### **Additional Contributors to the Study:**

The following persons, listed according to participating site, also contributed to this study through study participant recruitment or other assistance in study implementation.

- **Allegheny Singer Research Institute, Allegheny General Hospital:** Erica Butler, BS, CCRC; Jennifer Maiolo, PA-C; Sara Misplay, MBA, CCRC; David Skoner, MD; Glennys Smith
- **Ann & Robert H. Lurie Children's Hospital:** Iliana Flexas; Rajesh Kumar, MD, MS; Melanie Makhija; Nashmia Qamar; Christine Szychlinski, MS, APN, CPNP-PC
- **Arizona Respiratory Center, University of Arizona:** Valerie Bloss, BS; Mark Brown, MD; Katherine Chee, BS; Sarah David, MPH; Clara S. Ehrman, BS, BSHS; Dima Ezmigna, MBBS; Jamie Goodwin, PhD; Roni Grad, MD; Anunya Hiranatta, MD; Silvia Lopez, RN; Andrea Paco; Janette Priefert; Natalie S. Provencio, BS; Elizabeth Ryan, BS, RRT; Monica Varela, LPN; Monica Vasquez, MPH, M.Ed; Rosemary Weese, RN, RRT; Jesus Wences, BS
- **Benioff Children's Hospital – Oakland:** Jason Decker, RN; Keonna Harrison; Dayna Long, MD; Kelley Meade, MD; Robert Mok, LVN; Cindy Nelson-Purdy, NP, MPH; Dennis Ren; Hollie Stessel, CPHT
- **Boston Children's Hospital:** Lisa Bartnikas, MD; Alisha Bouzaher, MS; Christopher Burke; Matthew Cavanaugh; Julia Chen, PA-C; Elizabeth Cunningham; Amparito Cunningham; James Friedlander, MD; Enal Hindi; David Kantor, MD; Lianne Kopel, MD; Perdita Permaul, MD; Deviko Rao, MD; Melinda Rossi, MPH; Doris Schierembergg, MS; Lynda Schneider, MD; Jennifer Troung; Dale Umetsu, MD; Joseph Zhou, MD
- **Children's Hospital of Pittsburgh of the University of Pittsburgh Medical Center:** Shean Aujla, MD; John Broyles, CRNP; Hey Chong, MD; Patricia Dubin, MD; Jonathan Finder, MD; Todd D. Green, MD; Lori Holt, CRNP; Adam Kufen, RN; Geoffrey Kurland, MD; Rose Lanzo, RRT; David Nash, MD; Julianne Parente; Catherine Smith, RN; Jonathan Spahr, MD; Daniel J. Weiner, MD
- **Emory University:** Timothy Beaty, MD, MS; Shanae Wakefield Brown, RRT; Alice C. Bruce, BS; Jennifer C. Dodds, PhD; Shaneka Douglas, BS; Karen Freedle, MD, MPH; Dawn M. Simon, MD; Denise Whitlock, RRT
- **National Jewish Health:** Melanie Gleason, PA-C; Gayle Spears, PA-C; D.A. Sundstrom; Michael White
- **Nemours Children's Specialty Care, Jacksonville:** Jenny Batalla; Michelle Littlefield; Burnese Rutledge; Deanna Seymour

- **Nemours Children’s Specialty Care, Orlando:** Shanae Brown; Omar OquendoFlores
- **Pennsylvania State University:** Loretta Doty, MSW; Beth Gern; Aimee Merchlinski, MSIS; Jonathan Nelson; James Schmidt, BS; Lindsay Texter, BS; Angela Updegrave; Jennifer Zeller, BS; Ronald Zimmerman, Jr., MPA
- **Rainbow Babies and Children’s Hospital:** Daniel Craven, MD; Amy DiMarino, DO; Meeghan Hart, MD; Leigh A. Kerns, MD; Laurie Logan, RN; Laura Veri, RA
- **Rush University Medical Center:** Christopher Codispoti, MD, PhD; Jun Fu, PhD; Grace Li, BS; Diana Munoz-Mendoza, MD; Shannon Stevens; Benjamin Thompson, BS; Samantha Zitzer
- **University of California-San Francisco:** Jessica Bowman; Vicky Bowyer; Judy Gonzales-Vargas; Michelle McKean, RD, MP; Nancy Tran
- **University of New Mexico:** Christina Batson, BS; Lea Davies, MD; Franceska Kelly, BS, CCRC; Esmeralda Morales, MD; Abby Redway, RRT, BOE; Mary Spicher, BSN, MSN
- **University of Wisconsin-Madison:** Lauren Kaminski, BS; Megan R. Knutson, MS, RCEP; Shelly Olson, BS; Sheila Turcsanyi, BS, CCRC; Tanya Watson, RN, BSN
- **Wake Forest University:** Cheryl Wilmoth
- **Washington University School of Medicine:** Wanda Caldwell, MBA, RRT, BHS; Courtney Dula, MS; Alysa Ellis, MD; Caroline Horner, MD; Lila Kertz, PNP; Tina Norris, CRT; Katherine Rivera-Spoljaric, MD; Oscar Rodriguez, MD; Robert Strunk, MD

## CRITERIA FOR INITIATING RESCUE THERAPY (PREDNISOLONE)

The criteria for the initiating prednisolone are outlined below. These assume that the subject is already receiving treatment with short-acting beta agonist (SABA) as needed.

**Criteria for initiating prednisolone.** There are four scenarios for which prednisolone may be administered. The specific criteria for initiating prednisolone include the following:

### 1. Symptoms:

A. Symptoms do not improve after 3 ICS/SABA treatments administered every 20 minutes,

**-OR-**

B. >6 rescue treatments are needed for >24 hours (\*Note: 1 rescue treatment equals 1 nebulized albuterol treatment or 2 inhalations of albuterol by a metered dose inhaler. Nebulized albuterol is NOT encouraged for use in this study, but is listed here in the event that subjects ignore study advice concerning rescue treatment),

**-OR-**

C. Moderate-severe cough or wheeze occurs for at least 5 of the preceding 7 days,

**-OR-**

D. Specified thresholds of rescue ICS/SABA use are reached (see below):

I. **Short-term use:** a 2-day average of 528 mcg or more of fluticasone per day. This is equivalent to 12 or more inhalations of fluticasone (44 mcg/inhalation) for symptom relief for 2 consecutive days (1056 mcg or more in total over those two days).

II. **Medium-term use:** a 5-day average of 352 mcg or more of fluticasone per day. This is equivalent to 8 or more inhalations of fluticasone (44 mcg/inhalation) for symptom relief for 5 consecutive days (1760 mcg or more in total over those 5 days).

III. **Long-term use:** a 30-day average of 132 mcg or more of fluticasone per day. This is equivalent to 3 or more inhalations of fluticasone (44 mcg/inhalation) for symptom relief for 30 consecutive days (3960 mcg or more in total over those 30 days).

**-OR-**

2. There is an unscheduled visit for acute asthma care requiring repeated doses of SABA (physician office, urgent care, emergency department),

**-OR-**

3. Hospitalization is needed for asthma,

**-OR-**

4. Physician discretion.

If physician discretion is utilized, a specific reason for initiation of prednisolone will be recorded. As outlined above, specific criteria were established for initiating systemic corticosteroid therapy with prednisolone for increasing asthma symptoms. Since initiation of systemic corticosteroid treatment is the primary outcome, specific measures will be implemented to optimize consistency of its initiation, including: 1) re-emphasis of these guidelines to all investigators, 2) inclusion of multiple questions of this process in the investigator's certification examination to document their understanding of the process, 3) completion of a reporting form when systemic corticosteroids are initiated that includes the reason(s) for its initiation, and 4) Data Coordinating Center monitoring for potential disparities of prednisolone use and deviations from the process by center.

**Supplemental Table S1:****Sensitivity Analyses on Primary Outcome**

| Analysis                                                                       |                                                                                                                                     | Exacerbation Rate (95% CI) |                   | Relative Rate (95% CI)   |
|--------------------------------------------------------------------------------|-------------------------------------------------------------------------------------------------------------------------------------|----------------------------|-------------------|--------------------------|
|                                                                                |                                                                                                                                     | Acetaminophen              | Ibuprofen         |                          |
| <b>Primary:</b> use actual follow-up time and observed number of exacerbations |                                                                                                                                     | 0.81 (0.65, 1.02)          | 0.87 (0.69, 1.10) | <b>0.94 (0.69, 1.28)</b> |
| <b>Sensitivity:</b> impute full follow-up time for all dropouts                | Impute additional exacerbations beyond those observed to bring the total to 4                                                       | 1.51 (1.24, 1.82)          | 1.58 (1.30, 1.91) | <b>0.95 (0.73, 1.25)</b> |
|                                                                                | Impute no additional exacerbations beyond those observed prior to dropout                                                           | 0.74 (0.59, 0.93)          | 0.75 (0.59, 0.94) | <b>1.00 (0.73, 1.35)</b> |
|                                                                                | Impute random number of exacerbations, with maximum being 4 and minimum being the observed number of exacerbations prior to dropout | 1.13 (0.93, 1.37)          | 1.16 (0.96, 1.41) | <b>0.97 (0.74, 1.26)</b> |



**Supplemental Table S2:**

**Adverse Events (those with at least 5%) during the Treatment Phase**

| <b>Adverse Event Description</b> | <b>Ibuprofen</b> | <b>Acetaminophen</b> |
|----------------------------------|------------------|----------------------|
| Acute nasopharyngitis            | 15 (10%)         | 9 (6%)               |
| Acute pain NEC                   | 41 (27%)         | 59 (39%)             |
| Acute uri NOS                    | 6 (4%)           | 10 (7%)              |
| Allergic rhinitis NOS            | 35 (23%)         | 43 (29%)             |
| Allergy, unspecified             | 28 (19%)         | 28 (19%)             |
| Asthma NOS w (ac) exac           | 11 (7%)          | 12 (8%)              |
| Cough                            | 55 (37%)         | 54 (36%)             |
| Diarrhea                         | 30 (20%)         | 32 (21%)             |
| Fever NOS                        | 7 (5%)           | 10 (7%)              |
| Headache                         | 75 (50%)         | 92 (61%)             |
| Nonspecif skin erupt NEC         | 15 (10%)         | 13 (9%)              |
| Otalgia NOS                      | 8 (5%)           | 12 (8%)              |
| Otitis media NOS                 | 7 (5%)           | 10 (7%)              |
| Strep sore throat                | 28 (19%)         | 29 (19%)             |
| Teething syndrome                | 13 (9%)          | 16 (11%)             |
| Throat pain                      | 3 (2%)           | 9 (6%)               |
| Vomiting alone                   | 4 (3%)           | 9 (6%)               |
| Wheezing                         | 17 (11%)         | 17 (11%)             |

**Supplemental Table S3:****Serious Adverse Events (SAE) during the Treatment Phase**

| <b>SAE #</b> | <b>Reason for SAE</b>               | <b>Follow-up Treatment</b> | <b>Treatment Arm</b> |
|--------------|-------------------------------------|----------------------------|----------------------|
| 1            | Influenza                           | Hospitalization            | Ibuprofen            |
| 2            | Pneumonia due to RSV                | Hospitalization            | Acetaminophen        |
| 3            | Asthma Exacerbation                 | Hospitalization            | Acetaminophen        |
| 4            | Asthma Exacerbation                 | Hospitalization            | Ibuprofen            |
| 5            | Asthma Exacerbation                 | Hospitalization            | Ibuprofen            |
| 6            | Wheezing/Hypoxia                    | Hospitalization            | Ibuprofen            |
| 7            | Constipation                        | Hospitalization            | Ibuprofen            |
| 8            | Bronchitis                          | Hospitalization            | Ibuprofen            |
| 9            | Chronic Tonsillitis and Adenoiditis | Hospitalization            | Ibuprofen            |
| 10           | Asthma Exacerbation                 | Hospitalization            | Acetaminophen        |
| 11           | Asthma Exacerbation                 | Hospitalization            | Ibuprofen            |
| 12           | Simple laceration of simple mucosa  | Hospitalization            | Acetaminophen        |
| 13           | Cough                               | Hospitalization            | Ibuprofen            |
| 14           | Asthma Exacerbation                 | Hospitalization            | Ibuprofen            |
| 15           | Asthma Exacerbation                 | Hospitalization            | Ibuprofen            |
| 16           | Status Asthmaticus                  | Hospitalization            | Acetaminophen        |
| 17           | Asthma Exacerbation                 | Medication                 | Acetaminophen        |
| 18           | Asthma Exacerbation                 | Hospitalization            | Ibuprofen            |

**Supplemental Table S4:**

**Comparison of the frequency of usage of acetaminophen in this trial with other previous studies**

|                                                                                               | <b>Other Study</b>                                                                                                                                                                                                         | <b>AVICA Study Usage</b>                                                                                                                                                                                                                  |
|-----------------------------------------------------------------------------------------------|----------------------------------------------------------------------------------------------------------------------------------------------------------------------------------------------------------------------------|-------------------------------------------------------------------------------------------------------------------------------------------------------------------------------------------------------------------------------------------|
| <p>Wickens et al.<br/>CEA<br/>2010</p> <p>- Ages 5-6<br/>- One year<br/>- New Zealand</p>     | <p><b><u>ONE YEAR OF DATA:</u></b></p> <ul style="list-style-type: none"> <li>● 37% given acetaminophen &gt;10 times</li> <li>● 48% given acetaminophen 3-10 times</li> <li>● 16% given acetaminophen 0-2 times</li> </ul> | <ul style="list-style-type: none"> <li>● 46.7% given acetaminophen &gt;10 times <u>per year</u></li> <li>● 29.3% given acetaminophen 3-10 times <u>per year</u></li> <li>● 24.0% given acetaminophen 0-2 times <u>per year</u></li> </ul> |
| <p>Sordillo et al.<br/>JACI<br/>2015</p> <p>- Birth to 1 year<br/>- One year<br/>- USA</p>    | <p><b><u>ONE YEAR OF DATA:</u></b></p> <ul style="list-style-type: none"> <li>● 42% given acetaminophen &gt;10 times</li> <li>● 24% given acetaminophen 6-10 times</li> <li>● 29% given acetaminophen 1-5 times</li> </ul> | <ul style="list-style-type: none"> <li>● 46.7% given acetaminophen &gt;10 times <u>per year</u></li> <li>● 16.0% given acetaminophen 6-10 times <u>per year</u></li> <li>● 20.7% given acetaminophen 1-5 times <u>per year</u></li> </ul> |
| <p>Lowe et al.<br/>BMJ<br/>2010</p> <p>- Birth to 2 years<br/>- Two years<br/>- Australia</p> | <p><b><u>TWO YEARS OF DATA:</u></b></p> <ul style="list-style-type: none"> <li>● Cumulative “Days” of Exposure = 17 (10-27)<br/>Median (IQR)</li> </ul>                                                                    | <ul style="list-style-type: none"> <li>● 16.7 (4.2, 36.5) doses of exposure <u>per 2 years</u><br/>Median (IQR)</li> </ul>                                                                                                                |
